# Supplementary material for: Efficient stereoselective nucleophilic addition of pyrroles to chiral nitrones
Source: Royal Society of Chemistry journal article supplement (doi:10.1039/b802997k), 2008-01-01
Supplement: b802997k-c.pdf [file b802997k-c.pdf]

**Copies of ORTEP diagram for compounds 7a, 7b, 11 and 17** pp 34-37

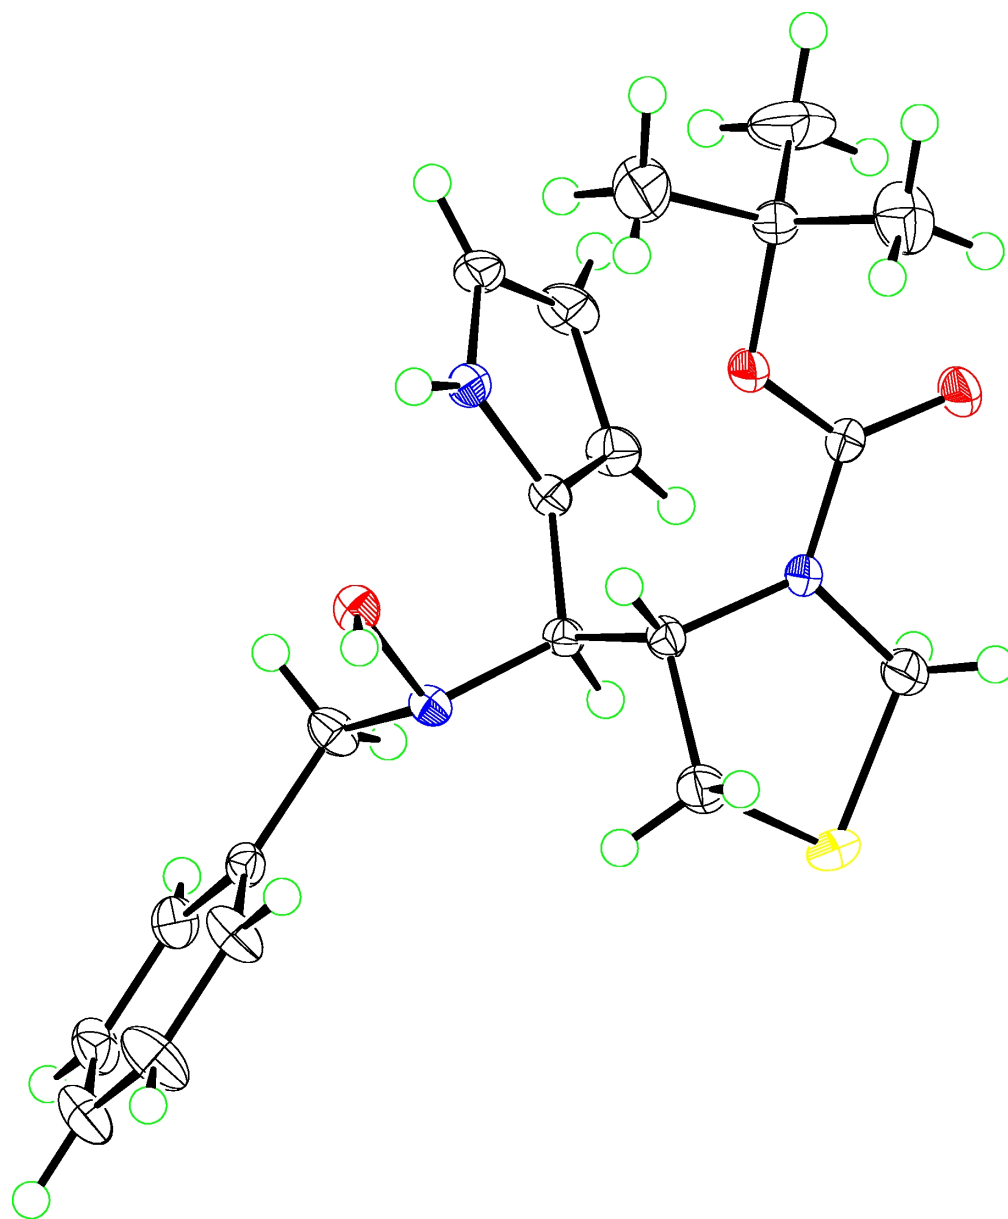

**X-ray Diagram for 7a**

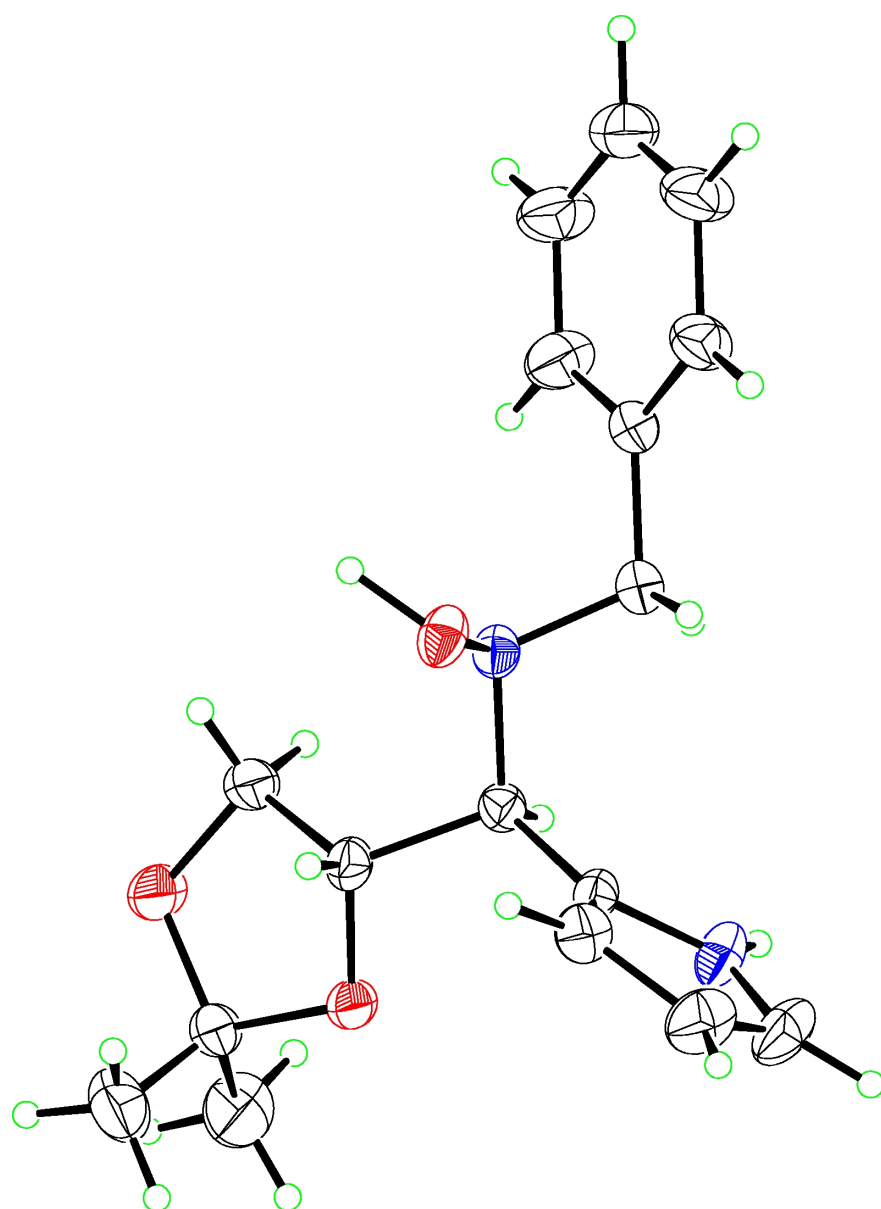

**X-ray Diagram for 7b**

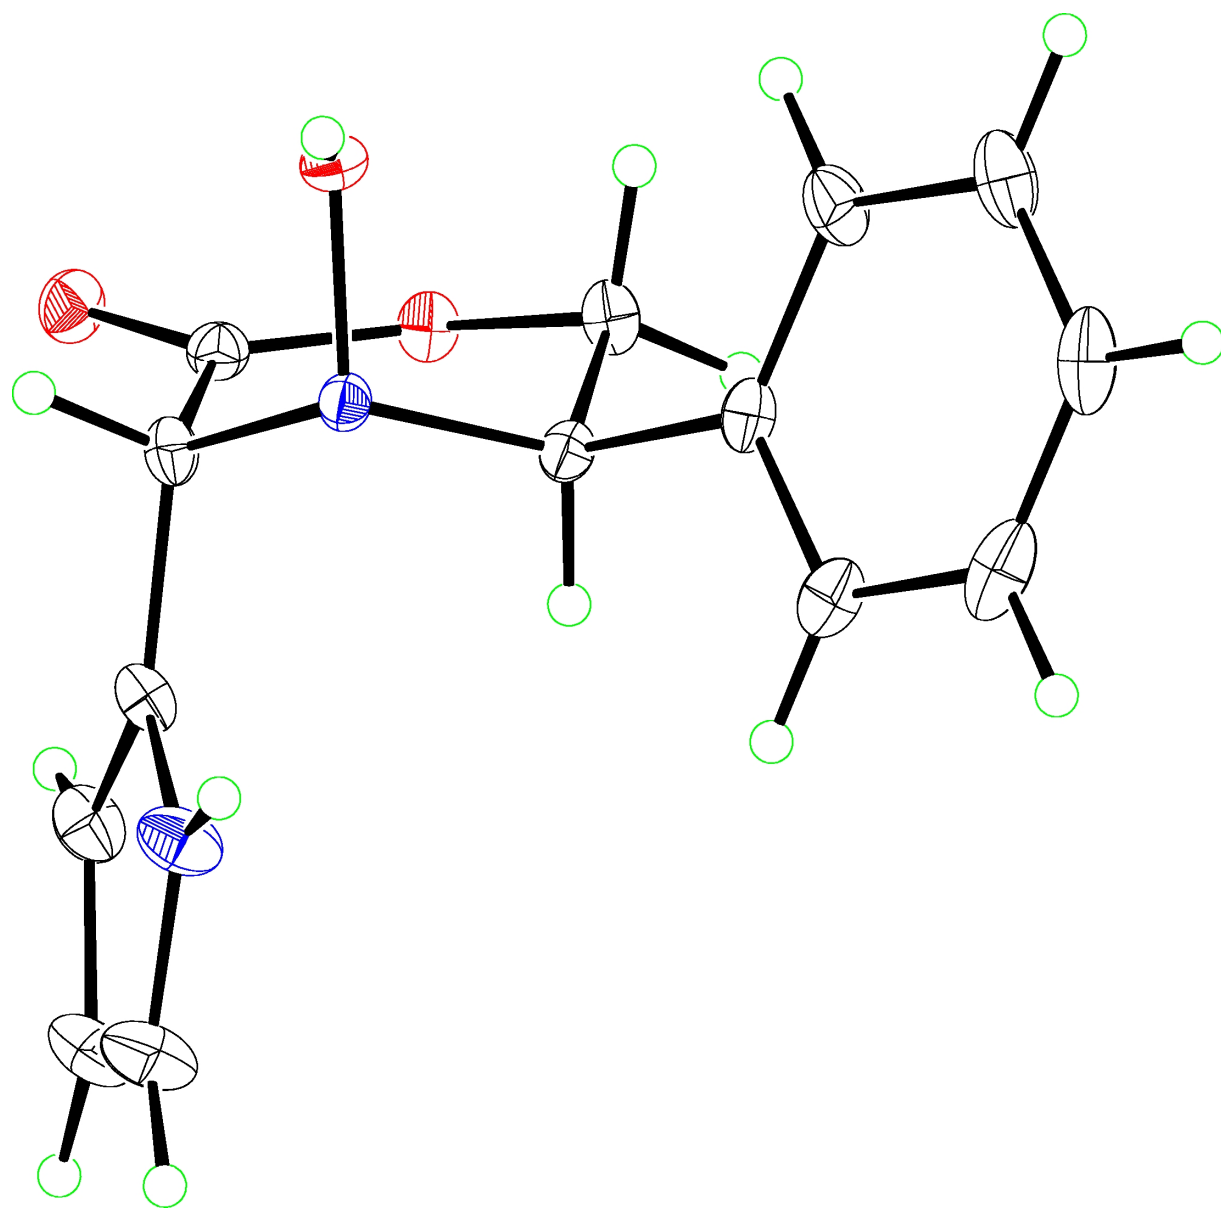

**X-ray Diagram for 11**

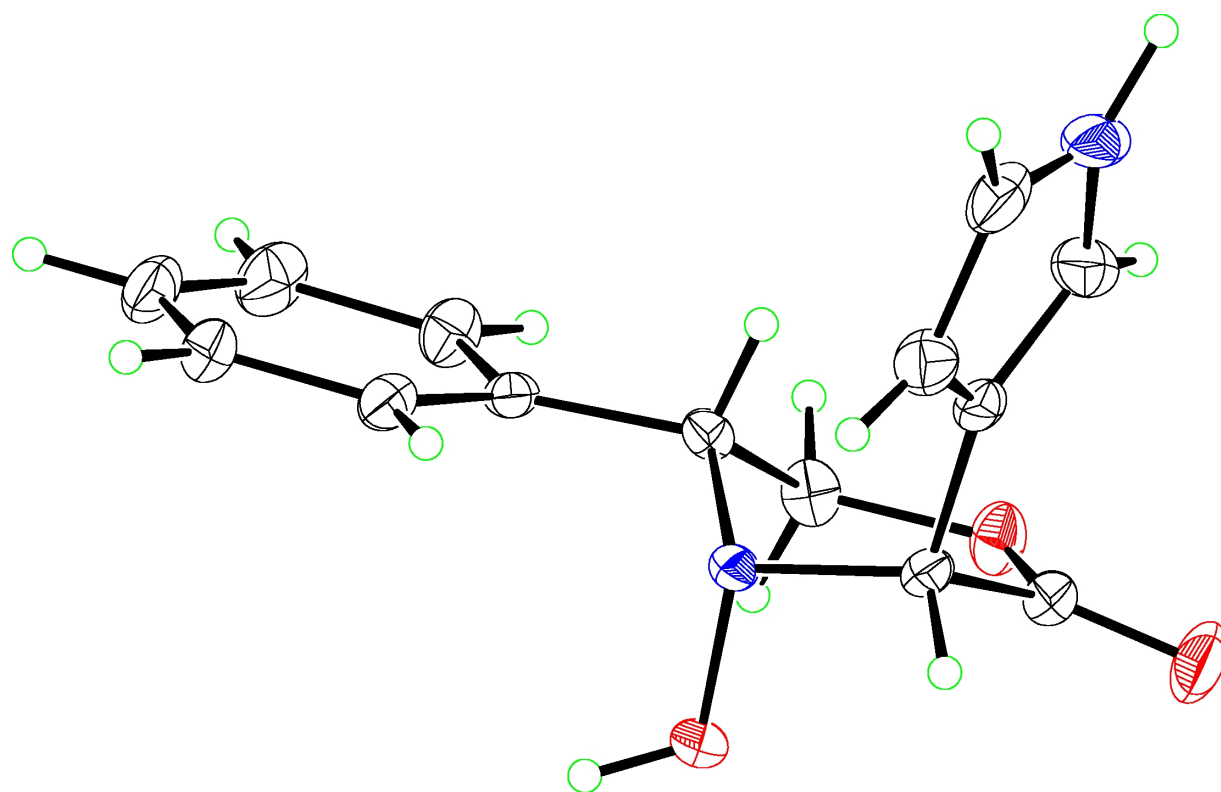

**X-ray Diagram for 17**
